# Supplementary material
Source: Springer Nature journal article supplement (https://www.springermedizin.de/resource/supplementary/12943_2010_771_MOESM7_ESM.pdf/9554780)

**A.** HepG2 (FBS-cultured)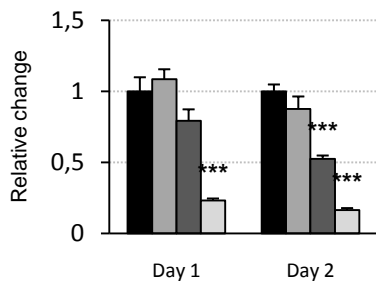

■ DMSO ■ FTS 50  $\mu$ M ■ FTS 100  $\mu$ M □ FTS 150  $\mu$ M

**B.** Huh7 (FBS-cultured)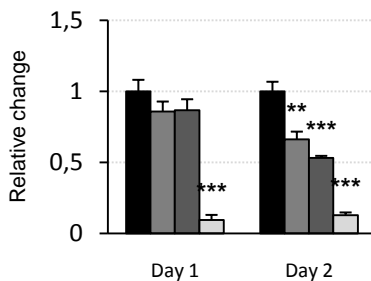**C.** Hep3B (FBS-cultured)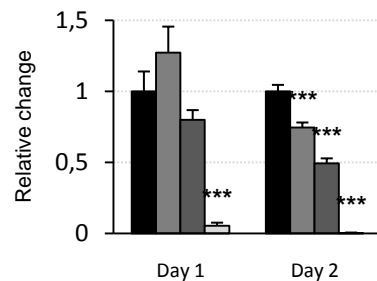**D.** HepG2 (EGF-cultured)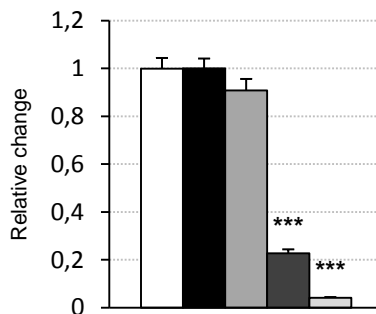

□ FBS ■ DMSO ■ FTS 50  $\mu$ M ■ FTS 100  $\mu$ M □ FTS 150  $\mu$ M

**E.** Huh7 (EGF-cultured)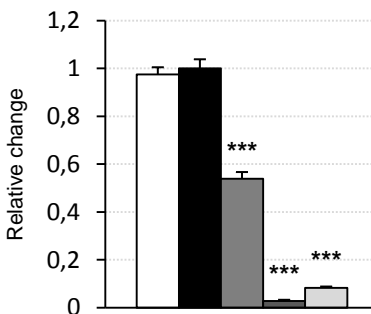**F.** Hep3B (EGF-cultured)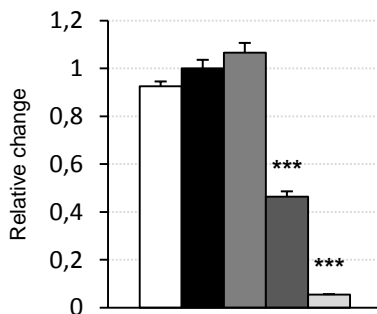**G.** HepG2 (IGF-cultured)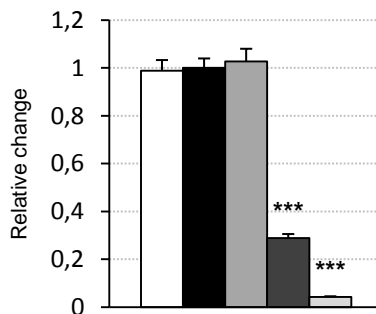

□ FBS ■ DMSO ■ FTS 50  $\mu$ M ■ FTS 100  $\mu$ M □ FTS 150  $\mu$ M

**H.** Huh7 (IGF-cultured)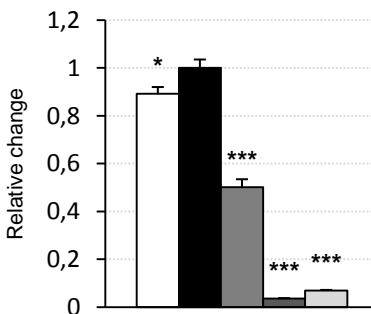**I.** Hep3B (IGF-cultured)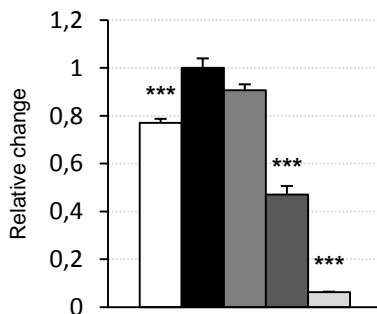

Supplement: MOESM7 [file 9554780]
